# Supplementary material for: Photoresponsive gadolinium–anthracene complexes: tuning the orientation and π–π stacking of anthracene groupsviaalkyl ester substituents of phosphonate ligands
Source: Royal Society of Chemistry journal article supplement (doi:10.1039/d2ce01012g), 2022-01-01
Supplement: d2ce01012g1.pdf [file d2ce01012g1.pdf]

## Supporting Information for

### **Photoresponsive gadolinium–anthracene complexes: tuning the orientation and $\pi$ – $\pi$ stacking of anthracene groups via alkyl ester substituents of phosphonate ligands**

Xin-Da Huang, Guo-Bin Sun, Yi-Qing Chen, Ge-Hua Wen, Song-Song Bao and Li-Min Zheng\*

State Key Laboratory of Coordination Chemistry, School of Chemistry and Chemical Engineering, Collaborative Innovation Centre of Advanced Microstructures, Nanjing University, Nanjing 210023, China.

E-mail: lmzheng@nju.edu.cn

**Table S1** Crystallographic data for compounds **1**, **2**, **2LT**, and **3**.

| Compound                                                                                 | <b>1</b>                                                              | <b>2</b>                                                                        | <b>2LT</b>                                                                      | <b>3</b>                                                                        |
|------------------------------------------------------------------------------------------|-----------------------------------------------------------------------|---------------------------------------------------------------------------------|---------------------------------------------------------------------------------|---------------------------------------------------------------------------------|
| Formula                                                                                  | C <sub>40</sub> H <sub>46</sub> GdN <sub>5</sub> O <sub>16</sub><br>P | C <sub>44</sub> H <sub>54</sub> GdN <sub>5</sub> O <sub>16</sub> P <sub>2</sub> | C <sub>44</sub> H <sub>54</sub> GdN <sub>5</sub> O <sub>16</sub> P <sub>2</sub> | C <sub>48</sub> H <sub>62</sub> GdN <sub>5</sub> O <sub>16</sub> P <sub>2</sub> |
| <i>T</i> / K                                                                             | 298(2)                                                                | 300(2)                                                                          | 260(2)                                                                          | 300(2)                                                                          |
| Mw                                                                                       | 1072.01                                                               | 1128.11                                                                         | 1183.59                                                                         | 1184.21                                                                         |
| Crystal system                                                                           | Triclinic                                                             | Monoclinic                                                                      | Triclinic                                                                       | Triclinic                                                                       |
| Space group                                                                              | <i>P</i> $\bar{1}$                                                    | <i>C</i> 2/ <i>c</i>                                                            | <i>P</i> $\bar{1}$                                                              | <i>P</i> 1                                                                      |
| <i>a</i> / Å                                                                             | 9.8914(6)                                                             | 11.555(7)                                                                       | 10.9046(19)                                                                     | 10.0234(8)                                                                      |
| <i>b</i> / Å                                                                             | 10.6271(7)                                                            | 19.054(12)                                                                      | 11.0745(18)                                                                     | 11.1948(9)                                                                      |
| <i>c</i> / Å                                                                             | 24.5080(14)                                                           | 23.235(16)                                                                      | 23.236(4)                                                                       | 13.8853(11)                                                                     |
| $\alpha$ / °                                                                             | 81.722(2)                                                             | 90                                                                              | 87.693(5)                                                                       | 112.863(3)                                                                      |
| $\beta$ / °                                                                              | 80.060(2)                                                             | 96.281(14)                                                                      | 88.109(5)                                                                       | 91.382(3)                                                                       |
| $\gamma$ / °                                                                             | 63.522(2)                                                             | 90                                                                              | 61.649(5)                                                                       | 111.730(3)                                                                      |
| <i>V</i> / Å <sup>3</sup>                                                                | 2264.8(2)                                                             | 5085(6)                                                                         | 2467.1(7)                                                                       | 1307.71(18)                                                                     |
| <i>Z</i>                                                                                 | 2                                                                     | 4                                                                               | 2                                                                               | 1                                                                               |
| $\rho_{\text{calcd}}$ / g cm <sup>-3</sup>                                               | 1.572                                                                 | 1.474                                                                           | 1.519                                                                           | 1.504                                                                           |
| <i>F</i> (000)                                                                           | 1086                                                                  | 2300                                                                            | 1150                                                                            | 607                                                                             |
| <i>R</i> <sub>int</sub>                                                                  | 0.0372                                                                | 0.0459                                                                          | 0.0298                                                                          | 0.0275                                                                          |
| GooF                                                                                     | 1.054                                                                 | 1.036                                                                           | 1.035                                                                           | 1.136                                                                           |
| <i>R</i> <sub>1</sub> , <i>wR</i> <sub>2</sub> [ <i>I</i> > 2σ( <i>I</i> )] <sup>a</sup> | 0.0485, 0.1011                                                        | 0.0543, 0.1312                                                                  | 0.0439, 0.1053                                                                  | 0.0354, 0.0628                                                                  |
| <i>R</i> <sub>1</sub> , <i>wR</i> <sub>2</sub> (all data) <sup>a</sup>                   | 0.0650, 0.1075                                                        | 0.0775, 0.1449                                                                  | 0.0578, 0.1132                                                                  | 0.0364, 0.0634                                                                  |
| CCDC number                                                                              | 2191729                                                               | 2191728                                                                         | 2191730                                                                         | 2191731                                                                         |

$$^a R_1 = \sum ||F_o| - |F_c|| / \sum |F_o|, wR_2 = [\sum w(F_o^2 - F_c^2)^2 / \sum w(F_o^2)^2]^{1/2}$$

**Table S2** Selected bond lengths (Å) and angles (°) for **1** at 298 K.

|            |            |             |            |
|------------|------------|-------------|------------|
| Gd1-O1     | 2.322(3)   | O4-Gd1-O12  | 126.91(13) |
| Gd1-O4     | 2.306(4)   | O4-Gd1-O14  | 80.84(13)  |
| Gd1-O5     | 2.468(4)   | O5-Gd1-O7   | 51.16(14)  |
| Gd1-O6     | 2.483(4)   | O5-Gd1-O8   | 71.92(13)  |
| Gd1-O8     | 2.531(4)   | O5-Gd1-O10  | 86.46(13)  |
| Gd1-O10    | 2.473(4)   | O5-Gd1-O11  | 150.43(13) |
| Gd1-O11    | 2.541(5)   | O5-Gd1-O12  | 140.77(14) |
| Gd1-O12    | 2.479(4)   | O5-Gd1-O14  | 76.85(13)  |
| Gd1-O14    | 2.346(3)   | O7-Gd1-O8   | 102.29(15) |
|            |            | O7-Gd1-O10  | 75.22(14)  |
| O1-Gd1-O4  | 84.35(12)  | O7-Gd1-O11  | 143.78(16) |
| O1-Gd1-O5  | 126.62(13) | O7-Gd1-O12  | 144.23(13) |
| O1-Gd1-O7  | 75.56(13)  | O7-Gd1-O14  | 124.00(13) |
| O1-Gd1-O8  | 123.88(13) | O8-Gd1-O10  | 50.61(12)  |
| O1-Gd1-O10 | 76.00(14)  | O8-Gd1-O11  | 112.44(14) |
| O1-Gd1-O11 | 76.76(13)  | O8-Gd1-O12  | 69.21(13)  |
| O1-Gd1-O12 | 81.07(12)  | O8-Gd1-O14  | 75.56(14)  |
| O1-Gd1-O14 | 151.49(14) | O10-Gd1-O11 | 119.60(13) |
| O4-Gd1-O5  | 86.90(13)  | O10-Gd1-O12 | 73.08(13)  |
| O4-Gd1-O7  | 77.50(14)  | O10-Gd1-O14 | 126.16(14) |
| O4-Gd1-O8  | 151.20(12) | O11-Gd1-O12 | 50.05(14)  |
| O4-Gd1-O10 | 149.54(12) | O11-Gd1-O14 | 76.24(14)  |
| O4-Gd1-O11 | 76.95(13)  | O12-Gd1-O14 | 88.55(12)  |

**Table S3** Selected bond lengths (Å) and angles (°) for **2** at 300 K.

|               |                      |               |          |
|---------------|----------------------|---------------|----------|
| Gd1-O1        | 2.307(5)             | O4-Gd1-O8A    | 155.3(3) |
| Gd1-O4        | 2.287(6)             | O4-Gd1-O8'A   | 49.7(3)  |
| Gd1-O5/ O5'   | 2.529(9)/ 2.424(15)  | O4-Gd1-O5'A   | 77.4(3)  |
| Gd1-O6/ O6'   | 2.579(10)/ 2.456(13) | O4-Gd1-O6'A   | 124.7(3) |
| Gd1-O8/ O8'   | 2.512(12)/ 2.522(12) | O5-Gd1-O6     | 48.6(3)  |
| Gd1-O8A/ O8'A | 2.512(12)/ 2.522(12) | O1A-Gd1-O5    | 68.0(2)  |
| Gd1-O5A       | 2.529(9)             | O5-Gd1-O5A    | 169.3(3) |
| Gd1-O6A       | 2.579(10)            | O5-Gd1-O6A    | 133.5(3) |
| Gd1-O1A       | 2.307(5)             | O1A-Gd1-O6    | 116.3(2) |
|               |                      | O5A-Gd1-O6    | 133.5(3) |
| O1-Gd1-O4     | 79.33(14)            | O6-Gd1-O6A    | 163.2(4) |
| O1-Gd1-O5     | 109.9(2)             | O1A-Gd1-O8    | 82.9(3)  |
| O1-Gd1-O6     | 67.1(2)              | O8-Gd1-O8A    | 49.3(4)  |
| O1-Gd1-O8     | 117.4(3)             | O8-Gd1-O8'A   | 50.2(4)  |
| O1-Gd1-O8'    | 130.9(3)             | O1A-Gd1-O8'   | 70.4(3)  |
| O1-Gd1-O5'    | 92.0(4)              | O8A-Gd1-O8'   | 50.2(4)  |
| O1-Gd1-O6'    | 84.1(3)              | O8'-Gd1-O8'A  | 60.6(4)  |
| O1-Gd1-O1A    | 158.7(2)             | O5'-Gd1-O6'   | 50.8(4)  |
| O1-Gd1-O5A    | 68.0(2)              | O1A-Gd1-O5'   | 83.3(4)  |
| O1-Gd1-O6A    | 116.3(2)             | O5'-Gd1-O5'A  | 154.7(4) |
| O1-Gd1-O8A    | 82.9(3)              | O5'-Gd1-O6'A  | 151.8(5) |
| O1-Gd1-O8'A   | 70.4(3)              | O1A-Gd1-O6'   | 108.3(3) |
| O1-Gd1-O5'A   | 83.3(4)              | O5'-Gd1-O6'   | 151.8(5) |
| O1-Gd1-O6'A   | 108.3(3)             | O6'-Gd1-O6'A  | 110.7(4) |
| O4-Gd1-O5     | 84.6(2)              | O1A-Gd1-O5A   | 109.9(2) |
| O4-Gd1-O6     | 98.4(3)              | O1A-Gd1-O6A   | 67.1(2)  |
| O4-Gd1-O8     | 155.3(3)             | O1A-Gd1-O8A   | 117.4(3) |
| O4-Gd1-O8'    | 149.7(3)             | O1A-Gd1-O8'A  | 130.9(3) |
| O4-Gd1-O5'    | 77.4(3)              | O1A-Gd1-O5'A  | 92.0(4)  |
| O4-Gd1-O6'    | 124.7(3)             | O1A-Gd1-O6'A  | 84.1(3)  |
| O1A-Gd1-O4    | 79.33(14)            | O5A-Gd1-O6A   | 48.6(3)  |
| O4-Gd1-O5A    | 84.6(2)              | O5'A-Gd1-O6'A | 50.8(4)  |
| O4-Gd1-O6A    | 98.4(3)              |               |          |

**Table S4** Selected bond lengths (Å) and angles (°) for **3** at 300 K.

|            |             |             |           |
|------------|-------------|-------------|-----------|
| Gd1-O1     | 2.330(5)    | O4-Gd1-O12  | 130.4(2)  |
| Gd1-O4     | 2.320(6)    | O4-Gd1-O14  | 82.86(19) |
| Gd1-O5     | 2.486(7)    | O5-Gd1-O7   | 50.78(19) |
| Gd1-O6     | 2.528(6)    | O5-Gd1-O8   | 72.5(2)   |
| Gd1-O8     | 2.525(7)    | O5-Gd1-O10  | 80.9(2)   |
| Gd1-O10    | 2.464(7)    | O5-Gd1-O11  | 151.8(2)  |
| Gd1-O11    | 2.522(7)    | O5-Gd1-O12  | 141.4(2)  |
| Gd1-O12    | 2.495(7)    | O5-Gd1-O14  | 78.98(18) |
| Gd1-O14    | 2.341(4)    | O7-Gd1-O8   | 105.1(2)  |
| O1-Gd1-O4  | 86.13(19)   | O7-Gd1-O10  | 73.5(2)   |
| O1-Gd1-O5  | 124.11(17)  | O7-Gd1-O11  | 144.4(2)  |
| O1-Gd1-O7  | 73.58(19)   | O7-Gd1-O12  | 140.4(2)  |
| O1-Gd1-O8  | 125.2(2)    | O7-Gd1-O14  | 126.1(2)  |
| O1-Gd1-O10 | 78.6(2)     | O8-Gd1-O10  | 50.68(19) |
| O1-Gd1-O11 | 79.05(19)   | O8-Gd1-O11  | 109.1(2)  |
| O1-Gd1-O12 | 78.8(2)     | O8-Gd1-O12  | 69.0(2)   |
| O1-Gd1-O14 | 153.47(19)  | O8-Gd1-O14  | 70.9(2)   |
| O4-Gd1-O5  | 85.2(2)     | O10-Gd1-O11 | 122.8(2)  |
| O4-Gd1-O7  | 75.7(2)     | O10-Gd1-O12 | 73.6(2)   |
| O4-Gd1-O8  | 148.1(2)    | O10-Gd1-O14 | 121.5(2)  |
| O4-Gd1-O10 | 14 8.42(18) | O11-Gd1-O12 | 50.7(2)   |
| O4-Gd1-O11 | 80.3(2)     | O11-Gd1-O14 | 75.3(2)   |
| O1-Gd1-O4  | 86.13(19)   | O12-Gd1-O14 | 90.2(2)   |

**Table S5** Intramolecular and intermolecular hydrogen bonding interactions.

| Compound 1                 |                          |                          |                              |
|----------------------------|--------------------------|--------------------------|------------------------------|
| D-H...A                    | $d_{H...A} / \text{\AA}$ | $d_{D...A} / \text{\AA}$ | Angle <sub>D-H...A</sub> / ° |
| C17-H17C...O9              | 2.637                    | 3.544                    | 157.8                        |
| C13-H13...O10              | 2.680                    | 3.581                    | 163.2                        |
| C35-H35B...O9              | 2.598                    | 3.439                    | 146.6                        |
| C7-H7... $\pi$ (C36, dmpu) | 2.835                    | 3.710                    | 157.8                        |
| Compound 2                 |                          |                          |                              |
| C17-H17B...O7              | 2.687                    | 3.714                    | 158.8                        |
| C17-H17B...O7'             | 2.813                    | 3.596                    | 157.0                        |
| C7-H7...O7                 | 2.577                    | 3.394                    | 146.7                        |
| C7-H7...O7'                | 2.748                    | 3.620                    | 156.5                        |
| C11-H11...O9               | 2.531                    | 3.356                    | 147.8                        |
| C12-H12...O7               | 2.640                    | 3.321                    | 130.66                       |
| C12-H12...O7'              | 2.939                    | 3.662                    | 135.6                        |
| C20-H20B...O9              | 2.568                    | 3.457                    | 154.3                        |
| C19-H19B...N1              | 3.382                    | 4.143                    | 137.68                       |
| Compound 3                 |                          |                          |                              |
| C9-H9...O13                | 2.667                    | 3.564                    | 162.5                        |
| C13-H13...O10              | 2.672                    | 3.560                    | 160.1                        |
| C26-H26... $\pi$ (C40)     | 2.784                    | 3.609                    | 148.3                        |
| C36-H36A...N4              | 2.808                    | 3.591                    | 139.3                        |
| C36-H36C...N5              | 3.30                     | 3.679                    | 103.8                        |

**Table S6** Selected bond lengths (Å) and bond angles (°) for **2LT** at 260 K.

|            |            |             |            |
|------------|------------|-------------|------------|
| Gd1-O1     | 2.329(3)   | O4-Gd1-O14  | 84.22(15)  |
| Gd1-O4     | 2.287(5)   | O5-Gd1-O6   | 51.13(13)  |
| Gd1-O5     | 2.485(4)   | O5-Gd1-O8   | 71.59(14)  |
| Gd1-O6     | 2.465(5)   | O5-Gd1-O10  | 104.56(14) |
| Gd1-O8     | 2.473(5)   | O5-Gd1-O11  | 145.80(15) |
| Gd1-O10    | 2.538(5)   | O5-Gd1-O12  | 135.12(14) |
| Gd1-O11    | 2.504(5)   | O5-Gd1-O14  | 73.79(13)  |
| Gd1-O12    | 2.485(4)   | O6-Gd1-O8   | 79.90(16)  |
| Gd1-O14    | 2.323(4)   | O6-Gd1-O10  | 72.86(16)  |
| O1-Gd1-O4  | 79.88(14)  | O6-Gd1-O11  | 155.42(13) |
| O1-Gd1-O5  | 128.08(12) | O6-Gd1-O12  | 139.57(17) |
| O1-Gd1-O6  | 80.78(13)  | O6-Gd1-O14  | 124.87(13) |
| O1-Gd1-O8  | 123.48(14) | O8-Gd1-O10  | 50.39(12)  |
| O1-Gd1-O10 | 73.20(14)  | O8-Gd1-O11  | 119.17(15) |
| O1-Gd1-O11 | 75.66(13)  | O8-Gd1-O12  | 70.43(15)  |
| O1-Gd1-O12 | 93.04(13)  | O8-Gd1-O14  | 81.01(15)  |
| O1-Gd1-O14 | 149.46(15) | O10-Gd1-O11 | 106.27(15) |
| O4-Gd1-O5  | 80.49(14)  | O10-Gd1-O12 | 67.15(16)  |
| O4-Gd1-O6  | 88.52(16)  | O10-Gd1-O14 | 126.51(15) |
| O4-Gd1-O8  | 151.09(12) | O11-Gd1-O12 | 49.96(16)  |
| O4-Gd1-O10 | 149.22(14) | O11-Gd1-O14 | 76.14(13)  |
| O4-Gd1-O11 | 80.63(15)  | O12-Gd1-O14 | 77.50(14)  |
| O4-Gd1-O12 | 129.96(15) |             |            |

**Table S7.** Metal-anthracene complexes capable of photocycloaddition reaction in the solid state.

| Compound                                                                                             | $d_{c-c}$ | SC-SC | reversible     | Ref.      |
|------------------------------------------------------------------------------------------------------|-----------|-------|----------------|-----------|
| (nBu <sub>4</sub> N) <sub>4</sub> [Cu <sub>2</sub> (anba) <sub>2</sub> ]                             | 3.698     | ×     | ✓ (bulk)       | S1        |
| [Ag(MAMA) <sub>2</sub> ]PF <sub>6</sub>                                                              | 3.698     | ×     | n.a.           | S2        |
| [Ag(MAMA) <sub>2</sub> ]BF <sub>4</sub>                                                              | 3.685     | ×     | n.a.           | S2        |
| [Ag(MAMA) <sub>2</sub> ][Ag(NO <sub>3</sub> ) <sub>2</sub> ]                                         | 3.819     | ×     | n.a.           | S2        |
| [Pt(BA2DA) <sub>2</sub> Cl <sub>2</sub> ]                                                            | 3.503     | ✓     | ✓ (bulk)       | S3        |
| Au(2-naphthyl)(L <sup>1</sup> )                                                                      | 3.891     | ✓     | n.a.           | S4        |
| [Eu <sub>2</sub> (hfa) <sub>6</sub> (Ant) <sub>2</sub> ]                                             | 3.958     | ✓     | n.a.           | S5        |
| [Dy(NO <sub>3</sub> ) <sub>3</sub> (L <sup>Et</sup> ) <sub>3</sub> ]                                 | 3.739     | ×     | ✓ (on surface) | S6        |
| [Dy(NO <sub>3</sub> ) <sub>3</sub> (L <sup>Et</sup> )(hmpa) <sub>2</sub> ]                           | 3.771     | ✓     | ✓ (bulk)       | S7        |
| [Gd(NO <sub>3</sub> ) <sub>3</sub> (L <sup>Et</sup> )(hmpa) <sub>2</sub> ]                           | 3.765     | ✓     | ✓ (bulk)       | S7        |
| [Dy(NO <sub>3</sub> ) <sub>3</sub> (L <sup>Et</sup> )(temdp)]                                        | 3.769     | ×     | ×              | S8        |
| [Dy(NO <sub>3</sub> ) <sub>3</sub> (L <sup>Me</sup> )(temdp)]                                        | 3.745     | ×     | ×              | S8        |
| [Dy(SCN) <sub>3</sub> (L <sup>Et</sup> ) <sub>2</sub> (4-hpy) <sub>2</sub> ]                         | 3.786     | ×     | ✓ (bulk)       | S9        |
| [DyX <sub>3</sub> (L <sup>Et</sup> ) <sub>3</sub> ] (X = Cl, Br)                                     | 3.78-3.94 | ×     | ✓ (on surface) | S10       |
| [Dy <sub>2</sub> (SCN) <sub>4</sub> (L <sup>2</sup> ) <sub>2</sub> (L <sup>Me</sup> ) <sub>4</sub> ] | 3.687     | ✓     | ✓ (bulk)       | S11       |
| [Gd(NO <sub>3</sub> ) <sub>3</sub> (L <sup>Me</sup> ) <sub>2</sub> (dmpu)]                           | 3.681     | ×     | ✓ (bulk)       | This work |
| [Gd(NO <sub>3</sub> ) <sub>3</sub> (L <sup>Et</sup> ) <sub>2</sub> (dmpu)]                           | 3.963     | ×     | ✓ (bulk)       | This work |

Abbreviation: nBu<sub>4</sub>N<sup>+</sup> = tetra-n-butylammonium cation, H<sub>4</sub>anba = N,N'-2,6-anthracenebis(oxamic acid), BA2DA = 1,2-Bis[(anthracen-9-ylmethylene) amino] ethane, MAMA = 9-(methylaminomethyl)anthracene, L<sup>1</sup> = isocyanoanthracene, Ant = 1,5-bis(diphenylphosphoryl)anthracene, hfac = hexafluoroacetylacetonate, temdp = tetraethylmethylenediphosphonate, 4-hpy = hydroxypyridine, HL<sup>2</sup> = 4-methyl-2,6-dimethoxyphenol. SC-SC = single crystal-to-single crystal transformation, n.a. = not available

#### References:

- (S1) M. Castellano, J. Ferrando -Soria, E. Pardo, M. Julve, F. Lloret, C. Mathonière, J. Pasán, C. Ruiz-Pérez, L. Cañadillas-Delgado, R. Ruiz-García and J. Cano, *Chem. Commun.*, 2011, **47**, 11035-11037.
- (S2) F. Spinelli, S. d'Agostino, P. Taddei, C. D. Jones, J. W. Steed and F. Grepioni, *Dalton Trans.*, 2018, **47**, 5725-5733.
- (S3) Q. Yu, M. Li, J. Gao, P. Xu, Q. Chen, D. Xing, J. Yan, M. J. Zaworotko, J. Xu, Y. Chen, P. Cheng and Z. Zhang, *Angew. Chem. Int. Ed.*, 2019, **58**, 18634–18640.
- (S4) K. Kato, T. Seki and H. Ito, *Inorg. Chem.*, 2021, **60**, 10849-10856.
- (S5) Y. Kitagawa, A. Naito, K. Aikawa, K. Shima, S. Shoji, K. Fushimi and Y. Hasegawa, *Chem.-Eur. J.*, 2022, e202104401.
- (S6) X.-D. Huang, M. Kurmoo, S.-S. Bao, K. Fan, Y. Xu, Z.-B. Hu and L.-M. Zheng, *Chem. Commun.*, 2018, **54**, 3278-3281;



- (S7) X.-D. Huang, Y. Xu, K. Fan, S.-S. Bao, M. Kurmoo and L.-M. Zheng, *Angew. Chem. Int. Ed.*, 2018, **57**, 8577-8581.
- (S8) X.-D. Huang, J.-G. Jia, M. Kurmoo, S.-S. Bao and L.-M. Zheng, *Dalton Trans.*, 2019, **48**, 13769–1377.
- (S9) X.-D. Huang, G.-H. Wen, S.-S. Bao, J.-G. Jia and L.-M. Zheng, *Chem. Sci.*, 2021, **12**, 929–937.
- (S10) X.-F. Ma, Y. Guo, X.-D. Huang, G.-H. Wen, S.-S. Bao, Y.-Q. Zhang and L.-M. Zheng, *Dalton Trans.*, 2022, **51**, 12026–12030.
- (S11) X.-D. Huang, X.-F. Ma, T. Shang, Y.-Q. Zhang and L.-M. Zheng, *Inorg. Chem.* 2022, **61**, DOI: 10.1021/acs.inorgchem.2c01210.

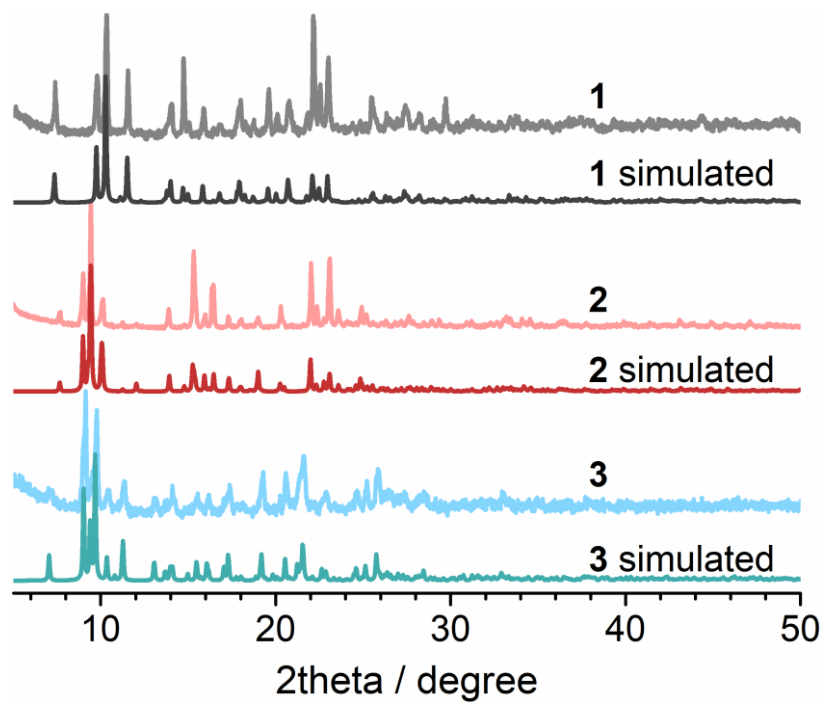

**Fig. S1** The PXRD patterns for powder samples of **1**, **2** and **3** compared with their simulated patterns from corresponding crystal structures.

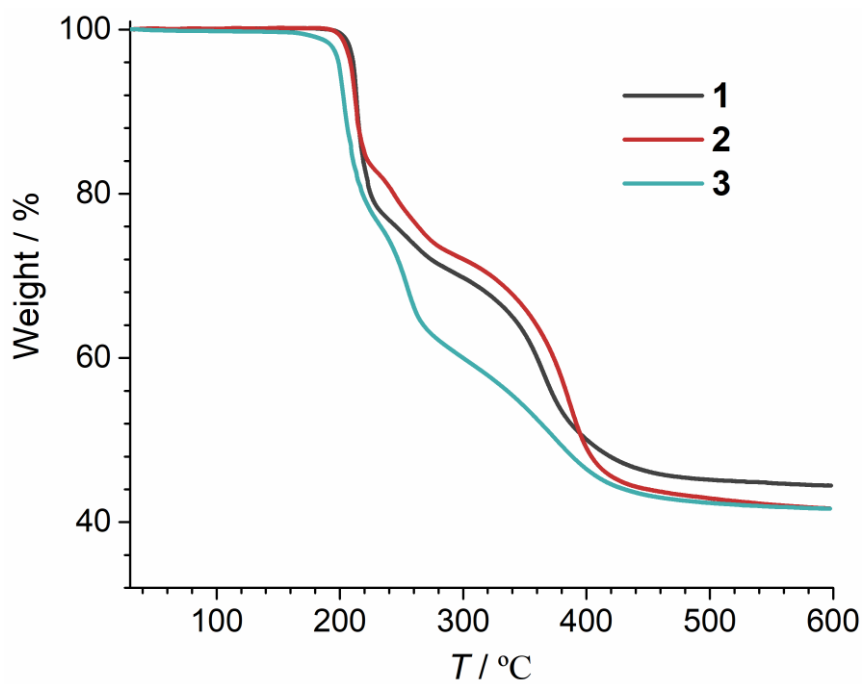

**Fig. S2** The thermogravimetric curves for compounds **1**, **2** and **3** between 30 - 600 °C.

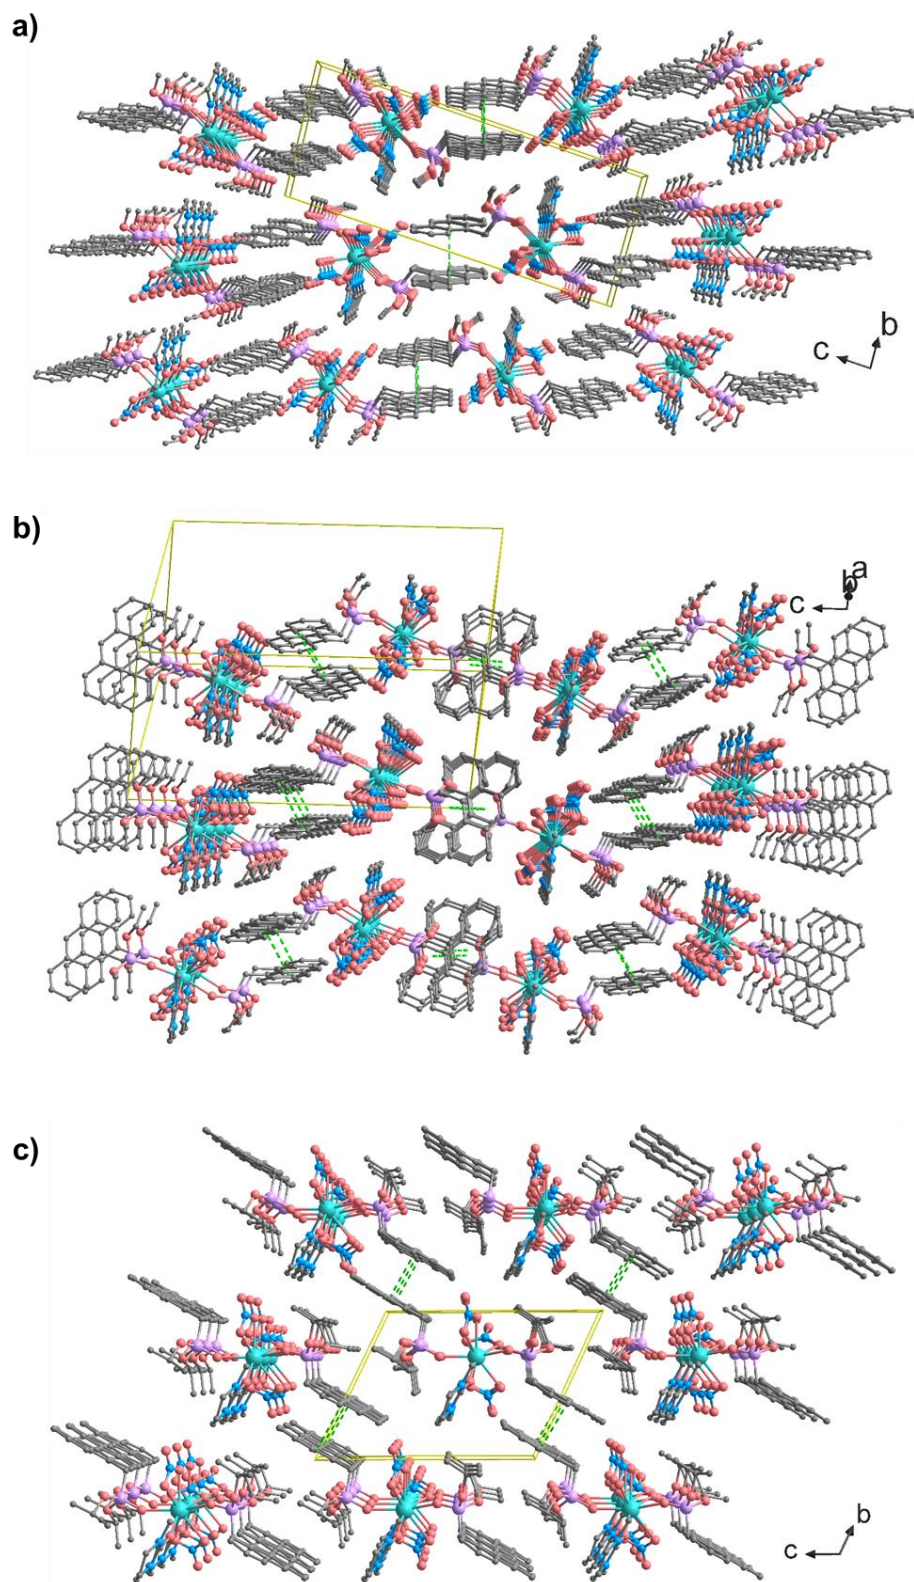

**Fig. S3** Packing diagrams of structures for compounds **1** (a), **2** (b) and **3** (c).

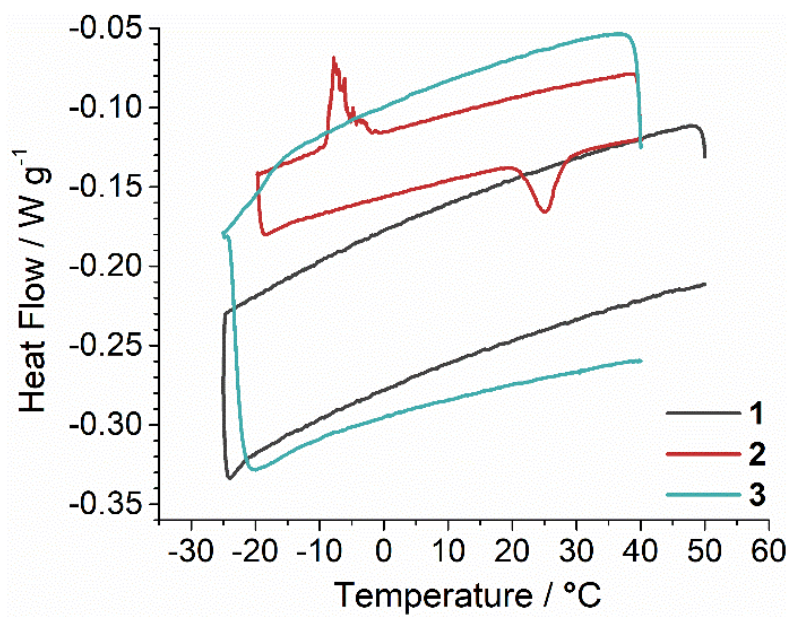

**Fig. S4** The DSC curves of compounds **1-3**.

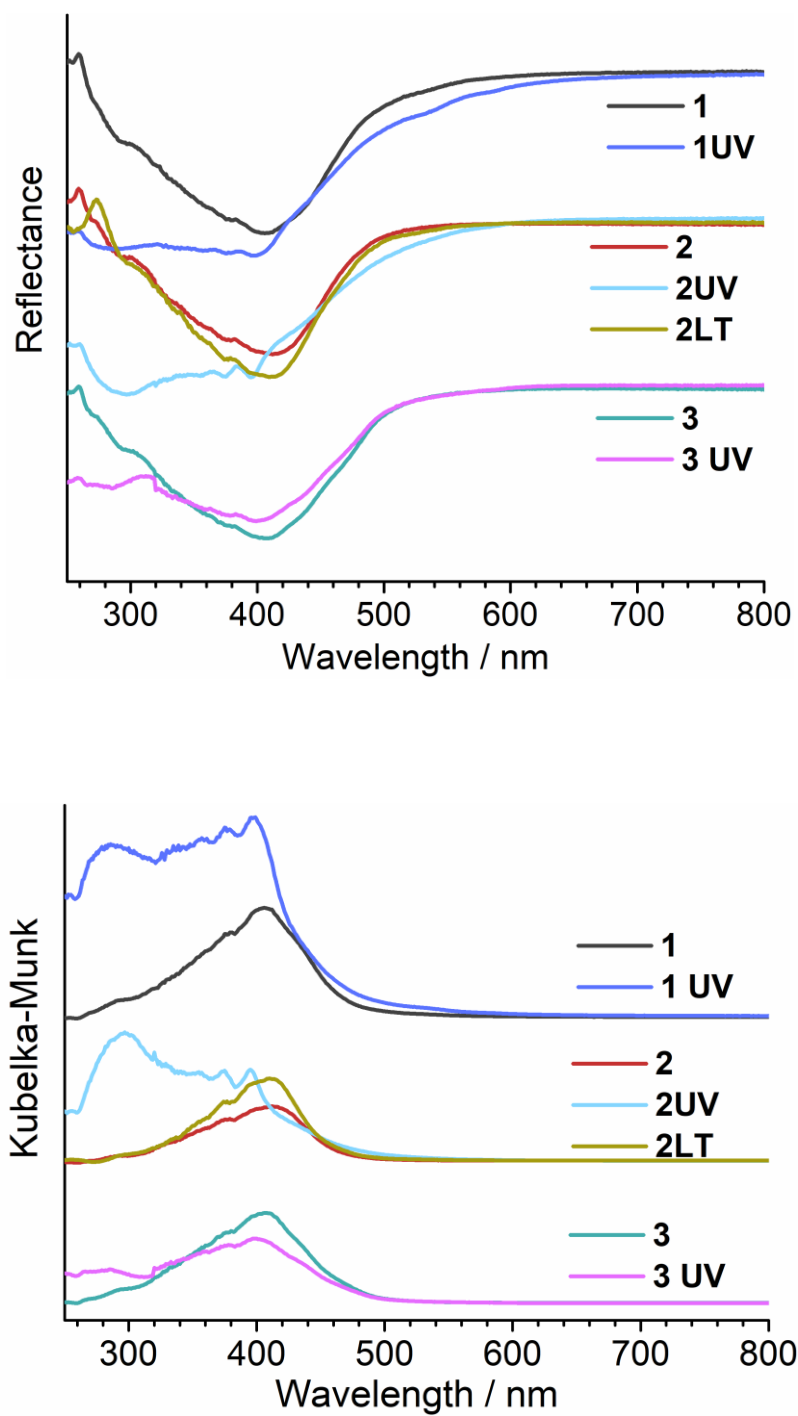

**Fig. S5** The UV-vis diffused reflectance spectra (top) and corresponding Kubelka-Munk functions:  $F(R) = (1-R)^2/2R$  (bottom) for all compounds before and after irradiation with LED UV light.

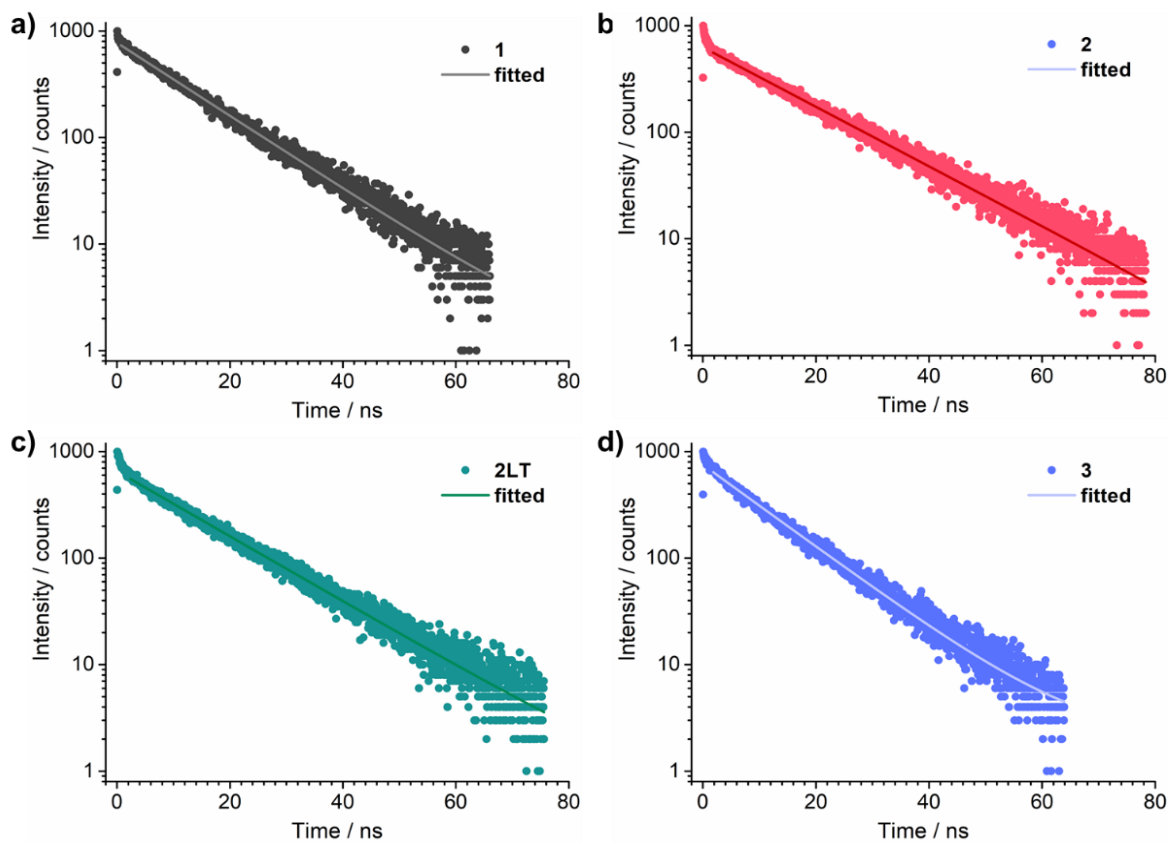

**Fig. S6** The fluorescent decay curves for compounds **1**, **2**, **2LT** and **3** excited at 374 nm. The decay profiles were fitted reasonably well to a single exponential function for obtaining the lifetime value via the software DAS6.

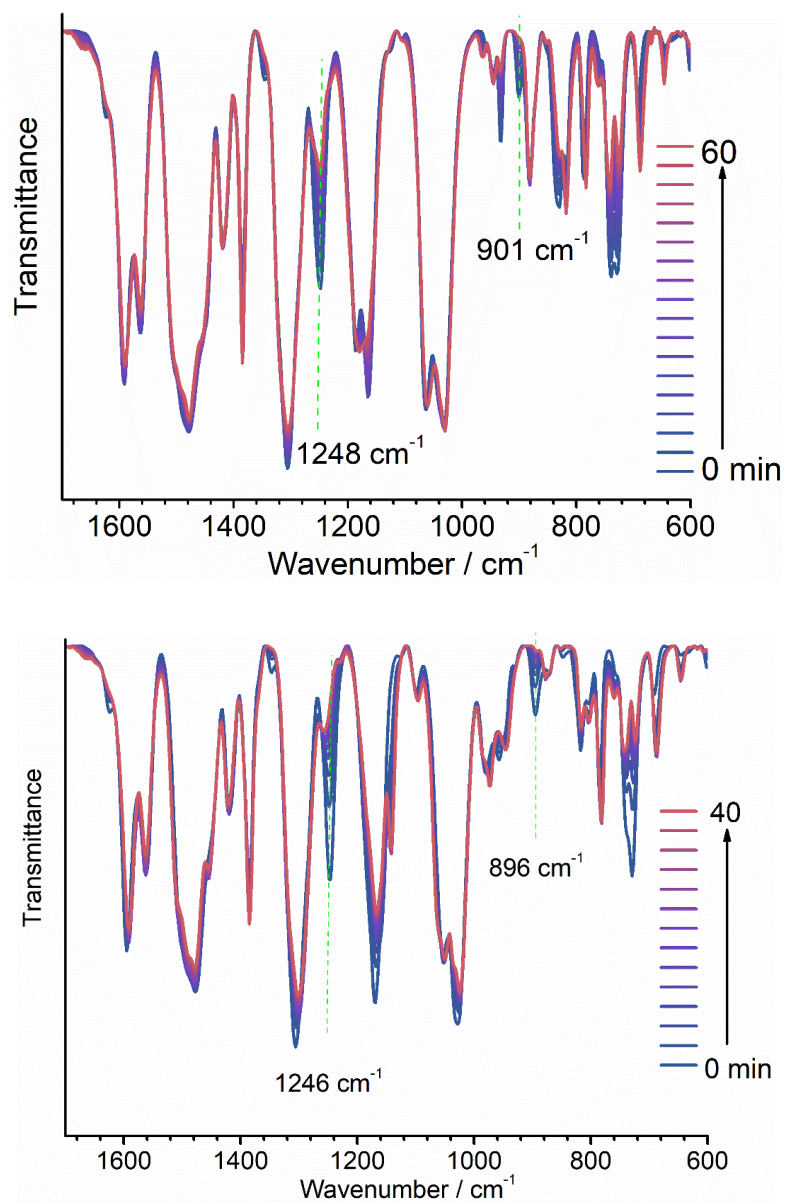

**Fig. S7** Time-dependent in-situ IR spectra for **1** (top) and **2** (bottom) exposed to 395 nm UV light for different period of time.

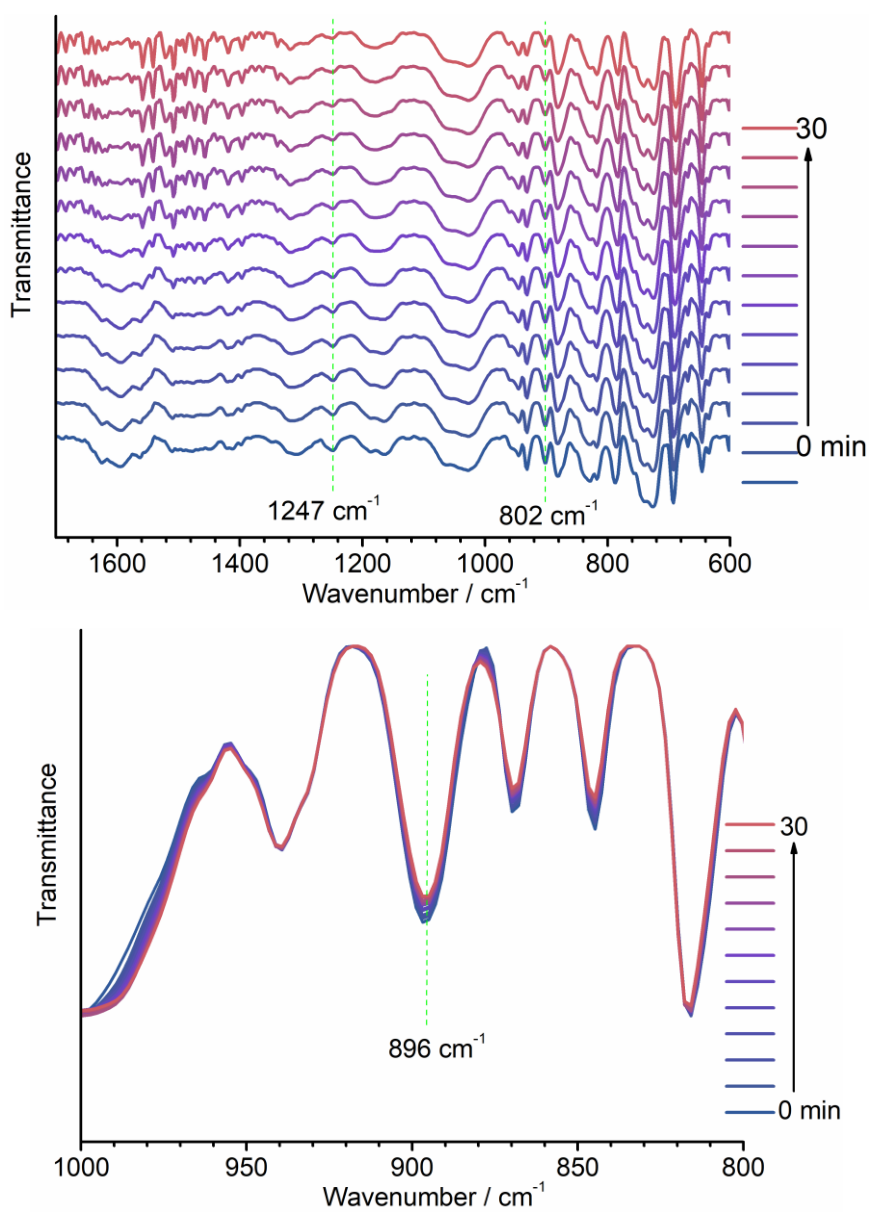

**Fig. S8** Time-dependent in-situ IR spectra for **3** exposed to 395 nm UV light up to 30 min shown in wavenumber range of 1700-600 cm<sup>-1</sup> (top) and 1000-800 cm<sup>-1</sup> (bottom).



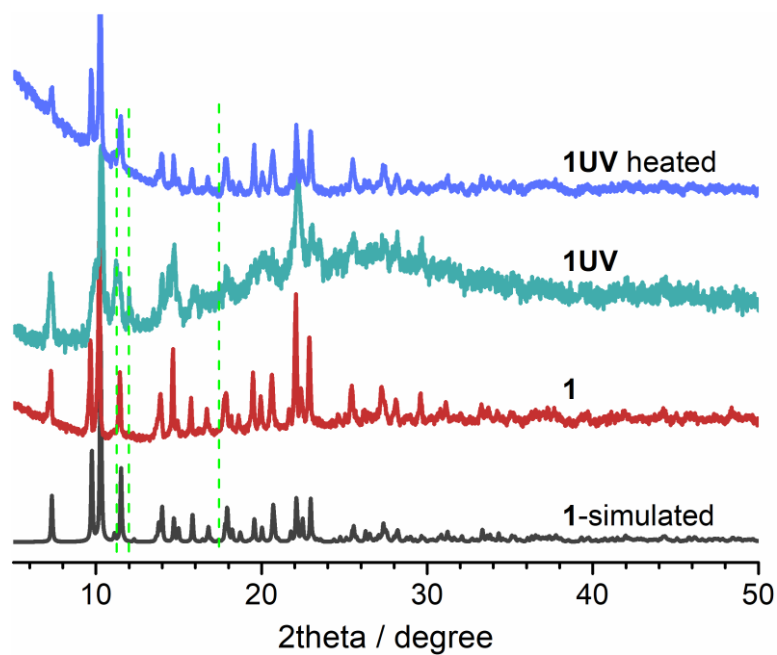

**Fig. S9** The PXRD patterns for **1**, **1UV** given by irradiation of **1** with 395 nm UV light for 5 hours, and the heated sample of **1UV** at 130 °C.

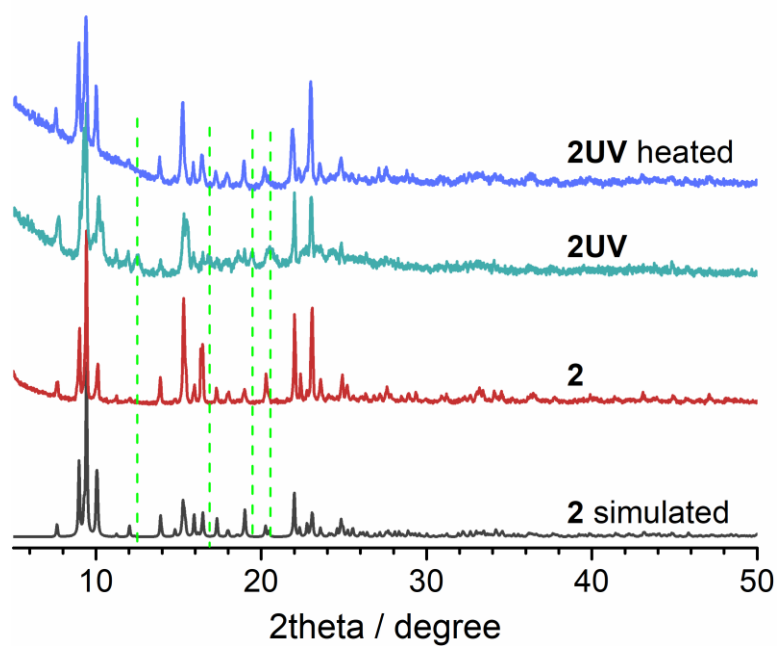

**Fig. S10** The PXRD patterns for **2**, **2UV** given by irradiation of **2** with 395 nm UV light for 3 hours, and the heated sample of **2UV** at 150 °C.

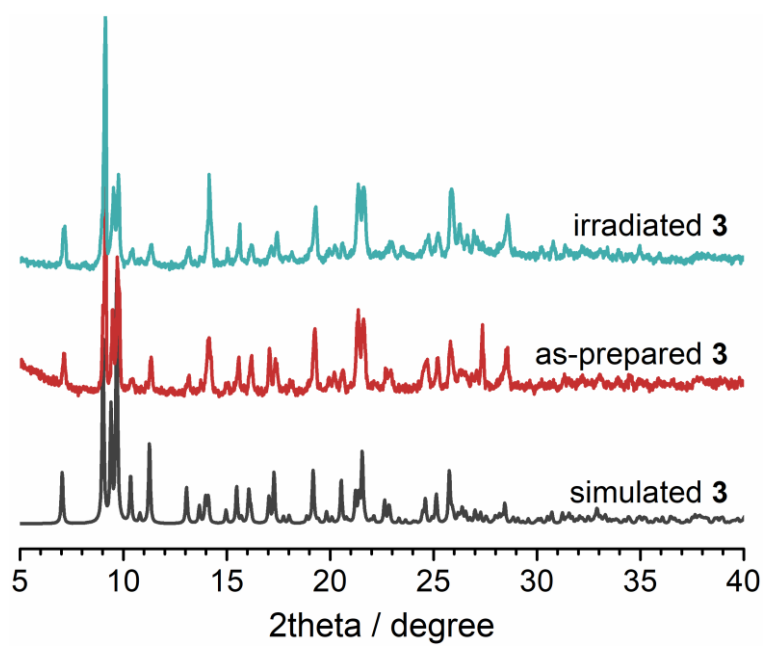

**Fig. S11** The PXR D patterns for **3** exposed to 395 nm UV for 5 hours.

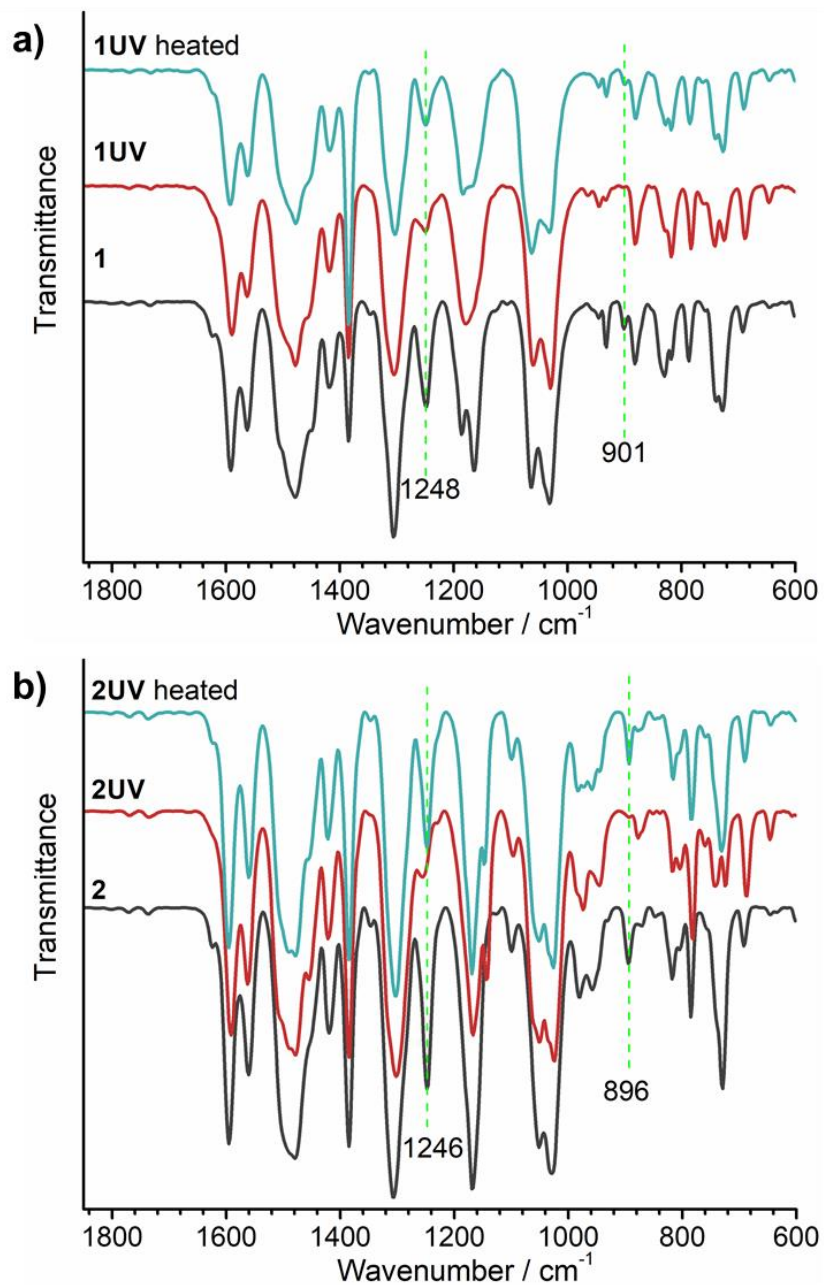

**Fig. S12** The reversed IR spectra for compound **1** and **2** after exposed to UV light and final thermal annealing 150 °C.

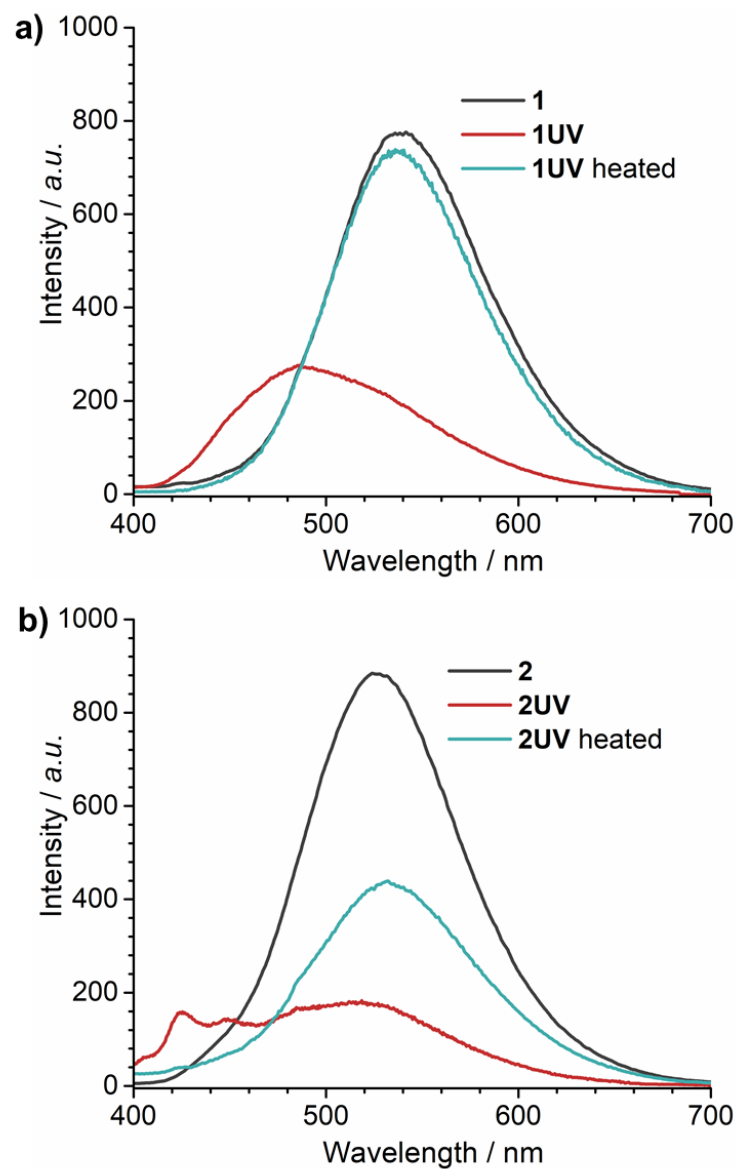

**Fig. S13** The reversed emission spectra for compound **1** and **2** after exposed to UV light and final thermal annealing at 130 and 150 °C.

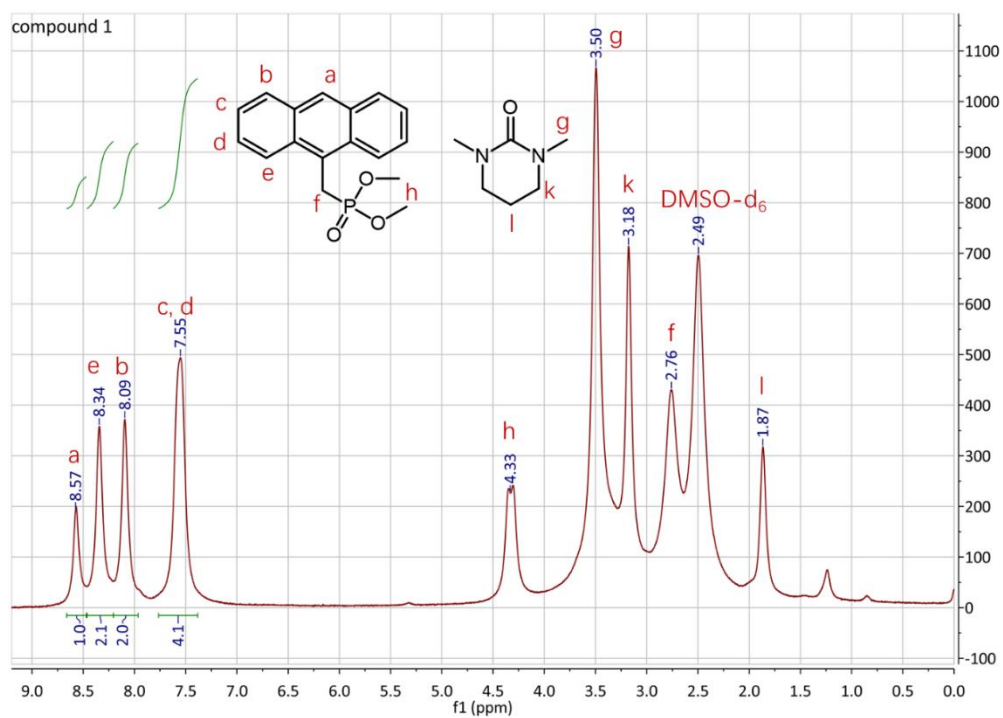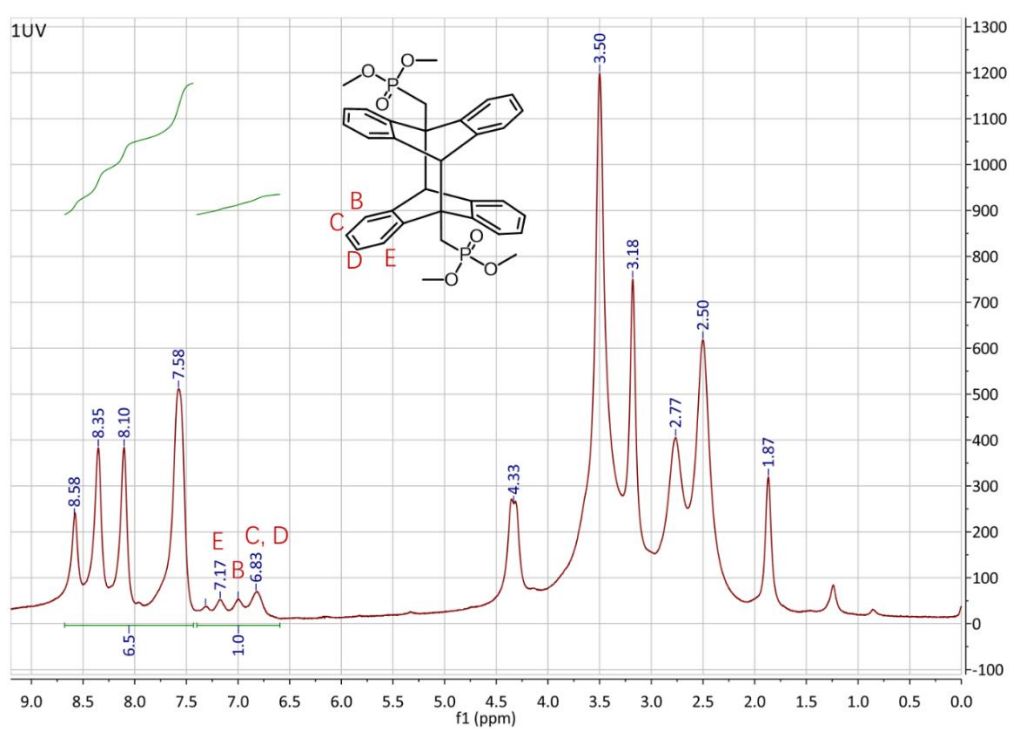

**Fig. S14** The  $^1\text{H}$  NMR spectrum of compounds **1** and **1UV** in  $\text{DMSO-}d_6$ . The irradiation of **1** upon 395 nm UV light for 3 hours gave the sample **1UV**.

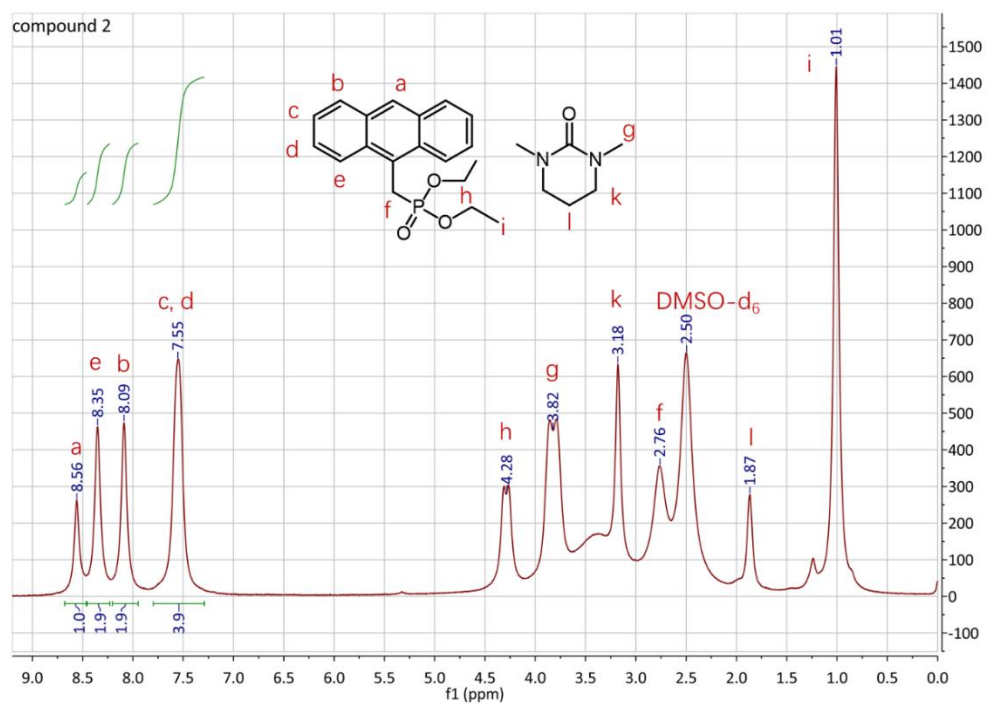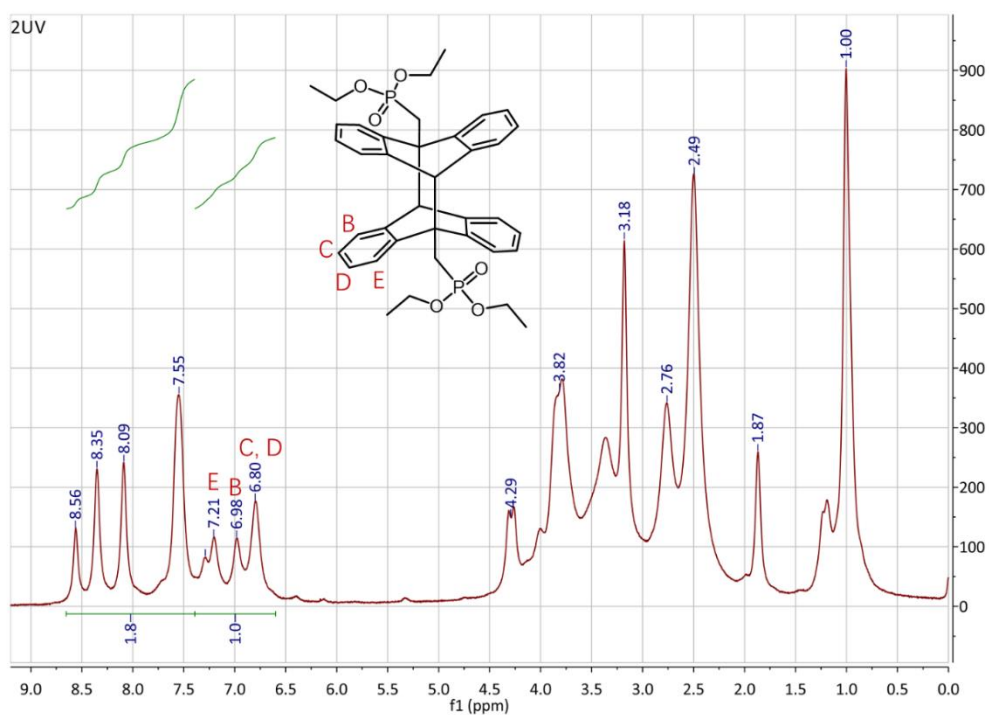

**Fig. S15** The  $^1\text{H}$  NMR spectrum of compounds **2** and **2UV** in  $\text{DMSO-}d_6$ . The irradiation of **2** upon 395 nm UV light for 3 hours gave the sample **2UV**.
